# Supplementary material for: A Metabolomic Profile Predictive of New Osteoporosis or Sarcopenia Development
Source: MDPI journal article supplement (doi:10.3390/metabo11050278), 2021-04-27
Supplement: s1 [file s1]

Supplementary Table 1. Detected metabolites.

|                          |
|--------------------------|
| Pyruvate                 |
| Butyrate                 |
| Lactate                  |
| 2-Hydroxyisobutyrate     |
| 2-Hydroxybutyrate        |
| 3-Hydroxybutyrate        |
| Fumarate                 |
| 2-Oxoisopentanoate       |
| fourOxopentanoate        |
| Succinate                |
| Isethionate              |
| 5-Oxoproline             |
| Citraconate              |
| 4-Methyl-2-oxopentanoate |
| Glutarate                |
| Malate                   |
| Threonate                |
| Octanoate                |
| 2-Oxoglutarate           |
| 2-Hydroxyglutarate       |
| Pelargonate              |
| Urate                    |
| Glycerophosphate         |
| cis-Aconitate            |
| Isocitrate               |
| Citrate                  |
| Glucuronate              |
| Dodecanoate              |
| NAcetylaspartate         |
| Hippurate                |

|                        |
|------------------------|
| Azelate                |
| Gluconate              |
| Mucate                 |
| 3-Indoxyl sulfate      |
| Urea                   |
| Gly                    |
| Trimethylamine N-oxide |
| beta-Ala               |
| Ala                    |
| 3-Aminoisobutyrate     |
| 2AB                    |
| N,N-Dimethylglycine    |
| Choline                |
| Ser                    |
| Diethanolamine         |
| Creatinine             |
| Pro                    |
| Val                    |
| Betaine                |
| Thr                    |
| Taurine                |
| Pipecolate             |
| Hydroxyproline         |
| Creatine               |
| Ile                    |
| Leu                    |
| GlyGly                 |
| Asn                    |
| Ornithine              |
| Asp                    |
| Hypoxanthine           |
| Proline betaine        |

|                          |
|--------------------------|
| gammaButyrobetaine       |
| Gln                      |
| Lys                      |
| Glu                      |
| Met                      |
| His                      |
| Carnitine                |
| Phe                      |
| 3-Methylhistidine        |
| Arg                      |
| Citrulline               |
| Tyr                      |
| o-Acetylcarnitine        |
| Trp                      |
| Cystine                  |
| Uridine                  |
| Glycerophosphorylcholine |
| PhePhe                   |
